# Supplementary material
Source: publisher site journal article supplement (https://www.spandidos-publications.com/7707/downloadSupplementary)

Figure S1. Effect of siRNAs on YTHDC2 knockdown. SiHa cells were either untreated or transfected with control siRNA or YTHDC2 siRNA for 48 h. Reverse transcription-quantitative PCR assessed the changes in YTHDC2 mRNA levels in the treated cells. si, small interfering; YTHDC2, YTH N6-methyladenosine RNA-binding protein C2; NC, negative control.

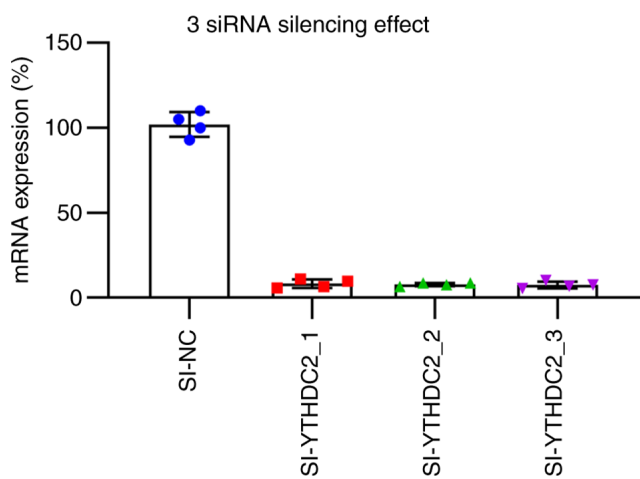

Supplement: Supplementary file 1 [file downloadSupplementary]
